# Supplementary material for: miR-200a-5p regulates myocardial necroptosis induced by Se deficiency via targeting RNF11
Source: PubMed Central journal article supplement — Redox Biol. 2017 Dec 8;15:159–69. doi: 10.1016/j.redox.2017.11.025 (PMC5975215; doi:10.1016/j.redox.2017.11.025), 2017-12-08
Supplement: mmc1.pdf [file mmc1.pdf]

Table S1 The SDEmiRs were identified between control group and Se-deficient group.

| sRNA             | log2. Fold_change. | p. value | STYLE |
|------------------|--------------------|----------|-------|
| gga-miR-1737     | -3.4744            | 0.1927   | DOWN  |
| gga-miR-1551-5p  | -2.5813            | 0.39964  | DOWN  |
| gga-miR-217-5p   | -2.5288            | 0.020577 | DOWN  |
| gga-miR-1684b-3p | -2.2479            | 0.036109 | DOWN  |
| gga-miR-1649-5p  | -2.0959            | 0.52374  | DOWN  |
| gga-miR-449a     | -2.0959            | 0.52374  | DOWN  |
| gga-miR-7b       | -1.9145            | 3.69E-30 | DOWN  |
| gga-miR-1329-3p  | -1.7739            | 0.60498  | DOWN  |
| gga-miR-1453     | -1.7739            | 0.60498  | DOWN  |
| gga-miR-1712-3p  | -1.7739            | 0.60498  | DOWN  |
| gga-miR-9-3p     | -1.7739            | 0.60498  | DOWN  |
| gga-miR-1635     | -1.5813            | 0.52393  | DOWN  |
| gga-miR-6606-5p  | -1.431             | 0.14787  | DOWN  |
| gga-miR-216b     | -1.426             | 0.29023  | DOWN  |
| gga-miR-34c-5p   | -1.3954            | 0.15968  | DOWN  |
| gga-miR-1651-3p  | -1.3589            | 0.70507  | DOWN  |
| gga-miR-1682     | -1.3589            | 0.70507  | DOWN  |
| gga-miR-1728-5p  | -1.3589            | 0.70507  | DOWN  |
| gga-miR-3528     | -1.3589            | 0.59247  | DOWN  |
| gga-miR-3536     | -1.3589            | 0.39738  | DOWN  |
| gga-miR-3607-3p  | -1.3589            | 0.70507  | DOWN  |
| gga-miR-6699-5p  | -1.3589            | 0.70507  | DOWN  |
| novel_145        | -1.3589            | 0.70507  | DOWN  |
| gga-miR-34b-5p   | -1.2633            | 0.075178 | DOWN  |
| gga-miR-32-5p    | -1.2629            | 5.05E-14 | DOWN  |
| gga-miR-144-3p   | -1.1943            | 2.77E-06 | DOWN  |
| gga-miR-1625-5p  | -1.189             | 0.5716   | DOWN  |
| gga-miR-1731-5p  | -1.189             | 0.4237   | DOWN  |
| gga-miR-20b-3p   | -1.0959            | 0.54941  | DOWN  |
| gga-miR-33-5p    | -0.99632           | 0.15903  | DOWN  |
| gga-miR-1663-3p  | -0.99632           | 0.63875  | DOWN  |
| gga-miR-20a-3p   | -0.99632           | 0.63875  | DOWN  |
| gga-miR-9-5p     | -0.93113           | 1.59E-05 | DOWN  |
| novel_128        | -0.88863           | 2.08E-25 | DOWN  |
| novel_11         | -0.86201           | 1.02E-29 | DOWN  |
| gga-miR-16-2-3p  | -0.85193           | 0.48726  | DOWN  |
| gga-miR-1467-5p  | -0.77393           | 0.8329   | DOWN  |
| gga-miR-1620     | -0.77393           | 0.8329   | DOWN  |
| gga-miR-1669     | -0.77393           | 0.8329   | DOWN  |
| gga-miR-1720-5p  | -0.77393           | 0.8329   | DOWN  |
| gga-miR-1754-5p  | -0.77393           | 0.8329   | DOWN  |
| gga-miR-1769-3p  | -0.77393           | 0.76542  | DOWN  |
| gga-miR-187-5p   | -0.77393           | 0.8329   | DOWN  |
| gga-miR-34b-3p   | -0.77393           | 0.8329   | DOWN  |
| gga-miR-34c-3p   | -0.77393           | 0.8329   | DOWN  |
| gga-miR-460b-3p  | -0.77393           | 0.76542  | DOWN  |
| gga-miR-6548-3p  | -0.77393           | 0.71479  | DOWN  |
| gga-miR-6669-3p  | -0.77393           | 0.8329   | DOWN  |
| novel_130        | -0.77393           | 0.76542  | DOWN  |
| novel_198        | -0.77393           | 0.8329   | DOWN  |
| novel_243        | -0.77393           | 0.76542  | DOWN  |
| gga-miR-460a-5p  | -0.75665           | 0.058421 | DOWN  |

|                   |          |            |      |
|-------------------|----------|------------|------|
| gga-miR-16-1-3p   | -0.69993 | 0.5439     | DOWN |
| gga-miR-365b-5p   | -0.69147 | 0.25484    | DOWN |
| gga-miR-1729-3p   | -0.66146 | 0.41517    | DOWN |
| gga-miR-6542-3p   | -0.6484  | 0.53537    | DOWN |
| gga-miR-18b-5p    | -0.63191 | 0.48439    | DOWN |
| gga-miR-21-3p     | -0.62954 | 0.42464    | DOWN |
| gga-miR-460b-5p   | -0.61043 | 0.52597    | DOWN |
| gga-miR-3539      | -0.60401 | 0.61447    | DOWN |
| gga-miR-148a-5p   | -0.60146 | 0.15869    | DOWN |
| gga-miR-3535      | -0.5999  | 0.43375    | DOWN |
| gga-miR-17-3p     | -0.58129 | 0.3585     | DOWN |
| gga-miR-6615-5p   | -0.56243 | 0.60091    | DOWN |
| gga-miR-140-3p    | -0.54362 | 4.10E-45   | DOWN |
| gga-miR-1782      | -0.5109  | 0.80131    | DOWN |
| gga-miR-3531-3p   | -0.5109  | 0.80131    | DOWN |
| gga-miR-3525      | -0.49478 | 0.29862    | DOWN |
| gga-miR-1563      | -0.452   | 0.769      | DOWN |
| gga-miR-23b-5p    | -0.452   | 0.769      | DOWN |
| novel_318         | -0.452   | 0.769      | DOWN |
| gga-miR-1329-5p   | -0.44272 | 0.41987    | DOWN |
| gga-miR-181b-1-3p | -0.42601 | 0.50742    | DOWN |
| gga-miR-190a-3p   | -0.42601 | 0.74032    | DOWN |
| gga-miR-140-5p    | -0.41393 | 2.40E-06   | DOWN |
| gga-miR-1560-3p   | -0.3906  | 0.52134    | DOWN |
| gga-miR-1656      | -0.35889 | 0.87657    | DOWN |
| gga-miR-1805-3p   | -0.35889 | 0.64124    | DOWN |
| gga-miR-3540      | -0.35889 | 0.82614    | DOWN |
| gga-miR-365-1-5p  | -0.35889 | 0.82614    | DOWN |
| gga-miR-383-5p    | -0.35889 | 0.87657    | DOWN |
| gga-miR-6590-3p   | -0.35889 | 0.87657    | DOWN |
| gga-miR-6615-3p   | -0.35889 | 0.87657    | DOWN |
| gga-miR-193b-3p   | -0.35284 | 0.093598   | DOWN |
| gga-miR-205a      | -0.3145  | 0.74063    | DOWN |
| gga-miR-2188-5p   | -0.31238 | 9.98E-05   | DOWN |
| gga-miR-130a-3p   | -0.28688 | 0.377      | DOWN |
| gga-miR-1729-5p   | -0.27861 | 0.16019    | DOWN |
| gga-miR-103-3p    | -0.27312 | 1.78E-30   | DOWN |
| novel_297         | -0.26578 | 0.26039    | DOWN |
| gga-miR-10b-5p    | -0.26542 | 0.00014095 | DOWN |
| gga-miR-1397-5p   | -0.25936 | 0.84477    | DOWN |
| gga-miR-1668-3p   | -0.25936 | 0.84477    | DOWN |
| gga-miR-181a-3p   | -0.25184 | 0.049666   | DOWN |
| gga-miR-490-3p    | -0.25166 | 1.05E-09   | DOWN |
| gga-miR-29b-3p    | -0.24927 | 0.34389    | DOWN |
| gga-miR-24-5p     | -0.24786 | 0.6099     | DOWN |
| gga-miR-142-3p    | -0.23656 | 0.13484    | DOWN |
| gga-miR-146c-5p   | -0.23273 | 2.56E-20   | DOWN |
| gga-miR-27b-3p    | -0.22593 | 1.22E-48   | DOWN |
| gga-miR-153-3p    | -0.22139 | 0.71008    | DOWN |
| gga-miR-138-1-3p  | -0.2145  | 0.77108    | DOWN |
| gga-miR-1306-3p   | -0.20456 | 0.52994    | DOWN |
| gga-miR-1743      | -0.18897 | 0.90041    | DOWN |
| gga-miR-29b-1-5p  | -0.18897 | 0.90041    | DOWN |
| gga-miR-489-3p    | -0.18897 | 0.8284     | DOWN |

|                  |            |            |      |
|------------------|------------|------------|------|
| gga-miR-147      | -0.16821   | 0.68831    | DOWN |
| gga-miR-16c-5p   | -0.15568   | 9.89E-08   | DOWN |
| gga-miR-301b-3p  | -0.15244   | 0.68355    | DOWN |
| gga-miR-101-3p   | -0.15178   | 6.46E-42   | DOWN |
| gga-miR-1677-5p  | -0.15008   | 0.66108    | DOWN |
| gga-miR-101-2-5p | -0.1365    | 0.87163    | DOWN |
| gga-miR-458b-5p  | -0.13553   | 0.17563    | DOWN |
| gga-miR-458a-3p  | -0.13233   | 0.17828    | DOWN |
| gga-miR-15b-5p   | -0.12981   | 0.43932    | DOWN |
| gga-miR-100-5p   | -0.12937   | 3.22E-30   | DOWN |
| gga-miR-138-2-3p | -0.12757   | 0.80171    | DOWN |
| gga-miR-222b-3p  | -0.12443   | 0.71124    | DOWN |
| gga-miR-133b     | -0.12298   | 0.0074985  | DOWN |
| gga-miR-1451-3p  | -0.12185   | 0.84748    | DOWN |
| gga-miR-499-3p   | -0.11578   | 0.00043789 | DOWN |
| gga-miR-1306-5p  | -0.10953   | 0.71953    | DOWN |
| gga-miR-19b-3p   | -0.09827   | 0.12477    | DOWN |
| gga-miR-137-3p   | -0.095859  | 0.91629    | DOWN |
| novel_204        | -0.095859  | 0.91629    | DOWN |
| gga-miR-199-3p   | -0.094851  | 7.94E-36   | DOWN |
| gga-miR-15a      | -0.090846  | 0.33797    | DOWN |
| gga-miR-10a-3p   | -0.085874  | 0.70066    | DOWN |
| gga-miR-146b-3p  | -0.084803  | 0.15882    | DOWN |
| gga-miR-455-5p   | -0.072207  | 0.29055    | DOWN |
| gga-miR-30a-5p   | -0.071705  | 1.88E-46   | DOWN |
| gga-miR-1744-3p  | -0.063437  | 0.89062    | DOWN |
| gga-miR-107-3p   | -0.063196  | 0.064064   | DOWN |
| gga-miR-1451-5p  | -0.051838  | 0.54605    | DOWN |
| gga-miR-456-3p   | -0.032493  | 0.44311    | DOWN |
| gga-miR-10a-5p   | -0.029916  | 9.10E-07   | DOWN |
| novel_313        | -0.029123  | 0.0041779  | DOWN |
| gga-miR-1454     | -0.026596  | 0.54003    | DOWN |
| gga-miR-125b-5p  | -0.02658   | 4.60E-13   | DOWN |
| gga-miR-18a-5p   | -0.02329   | 0.63518    | DOWN |
| gga-miR-15b-3p   | -0.014939  | 0.90514    | DOWN |
| gga-miR-3538     | -0.005256  | 0.87058    | DOWN |
| gga-miR-15c-5p   | -0.0035364 | 0.53403    | DOWN |
| gga-miR-7        | 0.0036771  | 0.060296   | UP   |
| gga-miR-18a-3p   | 0.0036771  | 0.91126    | UP   |
| gga-miR-142-5p   | 0.0039728  | 0.39653    | UP   |
| gga-miR-29a-3p   | 0.0046828  | 0.64714    | UP   |
| gga-miR-29c-3p   | 0.0046828  | 0.64714    | UP   |
| gga-miR-3524a    | 0.0092581  | 0.8502     | UP   |
| gga-miR-1559-5p  | 0.01143    | 0.39467    | UP   |
| gga-miR-219a     | 0.012779   | 0.50752    | UP   |
| gga-miR-219b     | 0.012779   | 0.50752    | UP   |
| gga-miR-301a-3p  | 0.014565   | 0.89602    | UP   |
| gga-miR-130c-3p  | 0.019303   | 0.6121     | UP   |
| gga-miR-19a-3p   | 0.02271    | 0.55383    | UP   |
| gga-miR-21-5p    | 0.032061   | 4.12E-18   | UP   |
| gga-miR-133c-5p  | 0.033424   | 0.94471    | UP   |
| gga-miR-1747-5p  | 0.033424   | 0.94471    | UP   |
| gga-miR-99a-3p   | 0.057798   | 0.71536    | UP   |
| gga-miR-106-5p   | 0.070652   | 0.58409    | UP   |

|                   |          |           |    |
|-------------------|----------|-----------|----|
| gga-miR-133c-3p   | 0.071336 | 0.0051589 | UP |
| gga-miR-99a-5p    | 0.07462  | 1.21E-07  | UP |
| gga-let-7b        | 0.075231 | 0.016746  | UP |
| novel_257         | 0.077206 | 0.90523   | UP |
| gga-let-7c-3p     | 0.088566 | 0.96134   | UP |
| gga-miR-181b-2-3p | 0.088566 | 0.96134   | UP |
| gga-miR-206       | 0.088566 | 0.96134   | UP |
| gga-let-7k-5p     | 0.091241 | 0.1949    | UP |
| gga-miR-20b-5p    | 0.10092  | 0.69065   | UP |
| gga-miR-148a-3p   | 0.10103  | 1.77E-14  | UP |
| gga-let-7c-5p     | 0.10103  | 0.36629   | UP |
| gga-miR-499-5p    | 0.10582  | 9.26E-94  | UP |
| gga-miR-17-5p     | 0.10596  | 0.46025   | UP |
| gga-miR-130b-5p   | 0.11079  | 0.79374   | UP |
| gga-miR-20a-5p    | 0.11425  | 0.20593   | UP |
| gga-miR-1781-3p   | 0.12985  | 0.96859   | UP |
| gga-miR-218-5p    | 0.13658  | 0.20684   | UP |
| gga-miR-30b-5p    | 0.13851  | 0.71423   | UP |
| gga-miR-23b-3p    | 0.14719  | 0.84758   | UP |
| gga-miR-135a-5p   | 0.15568  | 0.9916    | UP |
| gga-miR-1a-1-5p   | 0.15896  | 0.99367   | UP |
| gga-let-7i        | 0.15958  | 0.70169   | UP |
| gga-miR-133a-3p   | 0.16465  | 0.80572   | UP |
| gga-miR-26a-3p    | 0.17876  | 0.9911    | UP |
| gga-miR-222a      | 0.18032  | 0.86545   | UP |
| gga-let-7a-5p     | 0.19412  | 0.3624    | UP |
| gga-miR-10b-3p    | 0.22607  | 0.9849    | UP |
| gga-miR-128-1-5p  | 0.22607  | 0.94918   | UP |
| gga-miR-1456-3p   | 0.22607  | 0.99128   | UP |
| gga-miR-1550-3p   | 0.22607  | 0.98767   | UP |
| gga-miR-1618-5p   | 0.22607  | 0.99128   | UP |
| gga-miR-1626-5p   | 0.22607  | 0.9849    | UP |
| gga-miR-1685-3p   | 0.22607  | 0.99128   | UP |
| gga-miR-1685-5p   | 0.22607  | 0.99128   | UP |
| gga-miR-1728-3p   | 0.22607  | 0.99128   | UP |
| gga-miR-1779      | 0.22607  | 0.98767   | UP |
| gga-miR-1792      | 0.22607  | 0.99128   | UP |
| gga-miR-1795      | 0.22607  | 0.99128   | UP |
| gga-miR-1805-5p   | 0.22607  | 0.9849    | UP |
| gga-miR-183       | 0.22607  | 0.90312   | UP |
| gga-miR-200b-5p   | 0.22607  | 0.99128   | UP |
| gga-miR-29c-5p    | 0.22607  | 0.98767   | UP |
| gga-miR-30b-3p    | 0.22607  | 0.97108   | UP |
| gga-miR-3530-5p   | 0.22607  | 0.99128   | UP |
| gga-miR-3607-5p   | 0.22607  | 0.99128   | UP |
| gga-miR-6549-5p   | 0.22607  | 0.99128   | UP |
| gga-miR-6552-3p   | 0.22607  | 0.99128   | UP |
| gga-miR-6575-5p   | 0.22607  | 0.98767   | UP |
| gga-miR-6594-5p   | 0.22607  | 0.99128   | UP |
| gga-miR-6604-5p   | 0.22607  | 0.99128   | UP |
| gga-miR-7474-5p   | 0.22607  | 0.99128   | UP |
| novel_150         | 0.22607  | 0.99128   | UP |
| novel_191         | 0.22607  | 0.99128   | UP |
| novel_238         | 0.22607  | 0.99128   | UP |

|                  |         |           |    |
|------------------|---------|-----------|----|
| novel_251        | 0.22607 | 0.99128   | UP |
| novel_358        | 0.22607 | 0.98767   | UP |
| gga-miR-1677-3p  | 0.22729 | 0.70158   | UP |
| gga-miR-221-3p   | 0.2315  | 0.48213   | UP |
| gga-miR-144-5p   | 0.24925 | 0.6759    | UP |
| gga-miR-30a-3p   | 0.25317 | 0.43766   | UP |
| gga-miR-16-5p    | 0.25845 | 0.25315   | UP |
| novel_36         | 0.26968 | 0.29344   | UP |
| gga-let-7d       | 0.27069 | 0.78771   | UP |
| gga-miR-301b-5p  | 0.27312 | 0.78835   | UP |
| gga-miR-125b-3p  | 0.27406 | 0.54869   | UP |
| gga-miR-6550-3p  | 0.27854 | 0.9131    | UP |
| gga-miR-181b-5p  | 0.27943 | 0.19349   | UP |
| gga-miR-130b-3p  | 0.28233 | 0.30643   | UP |
| gga-miR-24-3p    | 0.28305 | 0.07157   | UP |
| gga-miR-365-3p   | 0.28434 | 0.63471   | UP |
| gga-miR-454-3p   | 0.28702 | 0.43172   | UP |
| gga-miR-1786     | 0.28747 | 0.87745   | UP |
| gga-miR-190a-5p  | 0.31683 | 0.80272   | UP |
| gga-miR-490-5p   | 0.31722 | 0.78424   | UP |
| gga-miR-30d      | 0.32013 | 2.27E-23  | UP |
| gga-let-7g-5p    | 0.32376 | 3.15E-10  | UP |
| gga-miR-6660-3p  | 0.32561 | 0.84486   | UP |
| gga-miR-30c-2-3p | 0.33305 | 0.19837   | UP |
| gga-miR-2131-3p  | 0.34343 | 0.79567   | UP |
| gga-miR-22-5p    | 0.35805 | 0.44873   | UP |
| gga-miR-1b-3p    | 0.36119 | 1.00E-30  | UP |
| gga-miR-106-3p   | 0.3698  | 0.68973   | UP |
| gga-miR-146c-3p  | 0.37275 | 0.34504   | UP |
| gga-miR-30c-1-3p | 0.37511 | 0.040167  | UP |
| gga-miR-22-3p    | 0.39789 | 3.27E-33  | UP |
| gga-miR-214      | 0.41146 | 0.04196   | UP |
| gga-miR-133a-5p  | 0.41632 | 9.04E-05  | UP |
| gga-miR-26a-5p   | 0.42204 | 1.94E-92  | UP |
| gga-miR-32-3p    | 0.42229 | 0.54265   | UP |
| gga-miR-27b-5p   | 0.43599 | 0.63349   | UP |
| gga-let-7a-3p    | 0.44397 | 0.3699    | UP |
| gga-miR-128-3p   | 0.44424 | 1.80E-15  | UP |
| gga-let-7f-5p    | 0.4444  | 4.43E-45  | UP |
| gga-miR-301a-5p  | 0.44846 | 0.72204   | UP |
| gga-miR-3531-5p  | 0.44846 | 0.89304   | UP |
| gga-miR-184-3p   | 0.452   | 0.26182   | UP |
| gga-miR-34a-5p   | 0.46638 | 0.45869   | UP |
| gga-miR-146a-3p  | 0.46649 | 0.25643   | UP |
| gga-miR-155      | 0.52052 | 0.47197   | UP |
| gga-let-7j-3p    | 0.5222  | 0.53256   | UP |
| gga-miR-146a-5p  | 0.54784 | 6.10E-06  | UP |
| gga-miR-2188-3p  | 0.548   | 0.83053   | UP |
| gga-miR-30e-3p   | 0.54861 | 8.53E-07  | UP |
| gga-miR-221-5p   | 0.56081 | 0.0013061 | UP |
| gga-miR-204      | 0.58611 | 0.34491   | UP |
| gga-miR-181a-5p  | 0.60595 | 1.37E-38  | UP |
| gga-miR-222b-5p  | 0.622   | 0.68978   | UP |
| gga-miR-223      | 0.63785 | 0.08288   | UP |

|                  |         |            |    |
|------------------|---------|------------|----|
| gga-miR-1655-5p  | 0.64111 | 0.81458    | UP |
| gga-miR-1b-5p    | 0.64111 | 0.86829    | UP |
| gga-miR-33-3p    | 0.64111 | 0.81458    | UP |
| gga-miR-6648-3p  | 0.64111 | 0.86829    | UP |
| gga-miR-92-3p    | 0.6576  | 4.01E-78   | UP |
| gga-miR-203a     | 0.66968 | 0.60995    | UP |
| gga-miR-3523     | 0.68328 | 0.41975    | UP |
| gga-miR-146b-5p  | 0.69072 | 1.75E-82   | UP |
| gga-miR-375      | 0.70251 | 0.60006    | UP |
| gga-miR-126-5p   | 0.70945 | 2.54E-29   | UP |
| gga-miR-1569     | 0.7115  | 0.80339    | UP |
| gga-miR-29b-2-5p | 0.73303 | 0.61255    | UP |
| gga-miR-187-3p   | 0.73626 | 0.50182    | UP |
| gga-miR-1416-5p  | 0.74919 | 0.00044701 | UP |
| gga-miR-130a-5p  | 0.75658 | 0.52775    | UP |
| gga-miR-2131-5p  | 0.75894 | 0.23664    | UP |
| gga-miR-1434     | 0.76664 | 0.68133    | UP |
| gga-miR-130c-5p  | 0.81103 | 0.6717     | UP |
| gga-miR-1708     | 0.81103 | 0.84967    | UP |
| gga-miR-365-2-5p | 0.81103 | 0.84967    | UP |
| gga-miR-6548-5p  | 0.81103 | 0.84967    | UP |
| gga-miR-6566-5p  | 0.81103 | 0.84967    | UP |
| gga-miR-6582-5p  | 0.81103 | 0.78866    | UP |
| gga-miR-1456-5p  | 0.84756 | 0.60731    | UP |
| gga-let-7f-3p    | 0.90414 | 0.54591    | UP |
| gga-miR-29a-5p   | 0.90414 | 0.72734    | UP |
| gga-miR-1662     | 0.92651 | 0.11404    | UP |
| gga-miR-3529     | 1.0334  | 0.59595    | UP |
| gga-miR-455-3p   | 1.1503  | 0.0039663  | UP |
| gga-miR-153-5p   | 1.2261  | 0.81268    | UP |
| gga-miR-1676-5p  | 1.2261  | 0.81268    | UP |
| gga-miR-1760     | 1.2261  | 0.81268    | UP |
| gga-miR-193a-3p  | 1.2261  | 0.73752    | UP |
| gga-miR-3532-3p  | 1.2261  | 0.59618    | UP |
| gga-miR-6544-3p  | 1.2261  | 0.63553    | UP |
| gga-miR-6582-3p  | 1.4485  | 0.46534    | UP |
| gga-miR-200b-3p  | 1.4834  | 0.0015968  | UP |
| gga-miR-138-5p   | 1.548   | 0.64395    | UP |
| gga-let-7a-2-3p  | 1.6184  | 0.32539    | UP |
| gga-miR-6544-5p  | 1.6411  | 0.53916    | UP |
| gga-miR-1684a-3p | 1.6666  | 0.011213   | UP |
| gga-miR-101-1-5p | 1.811   | 0.68382    | UP |
| gga-miR-1416-3p  | 1.811   | 0.68382    | UP |
| gga-miR-1710     | 1.811   | 0.68382    | UP |
| gga-miR-1727     | 1.811   | 0.68382    | UP |
| gga-miR-6557-3p  | 1.811   | 0.68382    | UP |
| gga-miR-6565-3p  | 1.811   | 0.68382    | UP |
| gga-miR-6631-5p  | 1.811   | 0.68382    | UP |
| gga-miR-200a-3p  | 1.8358  | 4.73E-08   | UP |
| gga-miR-429-3p   | 1.9761  | 0.12613    | UP |
| gga-miR-1707     | 2.2261  | 0.58358    | UP |
| gga-miR-18b-3p   | 2.2261  | 0.58358    | UP |
| gga-miR-215-3p   | 2.9265  | 0.24073    | UP |
| gga-miR-200a-5p  | 3.0334  | 0.38004    | UP |

|                |        |          |    |
|----------------|--------|----------|----|
| gga-miR-194    | 3.3252 | 4.11E-31 | UP |
| gga-miR-1756a  | 3.548  | 0.25762  | UP |
| gga-miR-122-3p | 4.0674 | 0.013321 | UP |
| gga-miR-122-5p | 4.0852 | 7.79E-63 | UP |
