# Supplementary material for: miR-200a-5p regulates myocardial necroptosis induced by Se deficiency via targeting RNF11
Source: PubMed Central journal article supplement — Redox Biol. 2017 Dec 8;15:159–69. doi: 10.1016/j.redox.2017.11.025 (PMC5975215; doi:10.1016/j.redox.2017.11.025), 2017-12-08
Supplement: mmc2.pdf [file mmc2.pdf]

**Table S2** Gene-special primers used in the real-time quantitative reverse-transcription PCR.

| Gene        | Primer sequence (5'→3')                                         |
|-------------|-----------------------------------------------------------------|
| U6          | CACGCAAATTCGTGAAGCGTTCCA                                        |
| miR-200a-5p | GCGCGCATCTTACTAGACAGTGCTGGA                                     |
| RNF11       | Forward: CCTATCCTCTGCGCTATTCC<br>Reverse: GCCATATCAGGAGCAAGTCC  |
| FADD        | Forward: GAACGTTGGGAGAGACTGGA<br>Reverse: TCTCGAAGCGACTGAAACAA  |
| Caspase8    | Forward: CACTGTGCCAACACTTGGAG<br>Reverse: CATTGCTTCCCTGCATTCT   |
| TAK1        | Forward: AAAAGGAGCTGATTGCCAGA<br>Reverse: GCTTCAGTGTTCGGTTCTCC  |
| TAB         | Forward: GTGACTGGCTTCTTGGTGCT<br>Reverse: TCTGCTTGGCAAACCTCTGTG |
| RIP2        | Forward: AGGCTTCAGCAACTCCGTAA<br>Reverse: GTAGCACCTTTGGAGCCTTG  |
| ERK         | Forward: TGGTACAGGGCTCCTGAAAT<br>Reverse: GGAAAGATGGGTCTGTTGGA  |
| JNK         | Forward: ATTACGCCTTCTGCCTTGTG<br>Reverse: AAAGCGCTGCATAAATGCTT  |
| P38         | Forward: GCATCCATCTTCGTCGTCAT<br>Reverse: TCATCTACAGCAACCCAGAGG |
| MLKL        | Forward: CACCGATACCAGGAGCCAGT<br>Reverse: AGCCAGCAAGTCCACGATCT  |
| RIP1        | Forward: TGCCTTCTGTTCTCACTGG<br>Reverse: CCTGCGTAGGTATTGCAGCTT  |
| RIP3        | Forward: ACATCCTTCGCTCACAGCAA                                   |

---

|                |                               |
|----------------|-------------------------------|
|                | Reverse: ACCTGTGCTGCCTTCTCTCC |
| TNF- $\alpha$  | Forward: CAGGACAGCCTATGCCAACA |
|                | Reverse: ACAGCCAAGTCAACGCTCCT |
| Nf- $\kappa$ B | Forward: ATTATTCGCCAGGCAGCAGT |
|                | Reverse: ACAGGATCAAGCCTCCGTGT |
| $\beta$ -actin | Forward: CCTGGCACCTAGCACAATGA |
|                | Reverse: CCTGCTTGCTGATCCACATC |

---
